# Supplementary material
Source: PubMed Central journal article supplement (PMC6962014)

**Table S1.** Patient demographics, and sample information. AA = African-American, H = Hispanic, HW = Hispanic White, W = White. DFU=diabetic foot ulcer.

Diabetic Foot Ulcer Tissue Samples

| Sample | Age | Gender<br>(M/F) | Ethnicity<br>(AA/A/H/HW/W) | Ulcer location   |
|--------|-----|-----------------|----------------------------|------------------|
| DFU #1 | 58  | M               | H                          | Toe plantar      |
| DFU #2 | 52  | M               | HW                         | Mid foot lateral |
| DFU #3 | 87  | M               | W                          | Plantar midfoot  |
| DFU #4 | 56  | M               | HW                         | Plantar midfoot  |
| DFU #5 | 63  | M               | AA                         | Plantar midfoot  |
| DFU #6 | 59  | M               | HW                         | Toe plantar      |

Supplemental Figure 1.

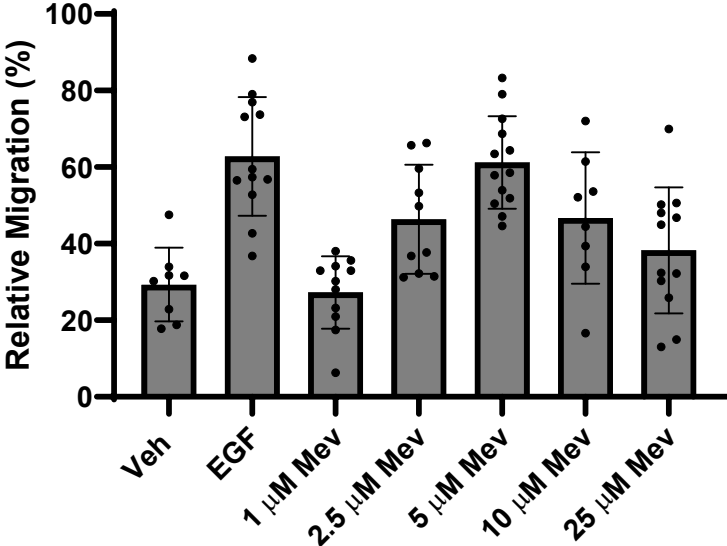

# Supplemental Figure 2.

A.

Mevastatin signature of EGFR activation  
 z-score: 2.157  
 p-value 1.15E-12

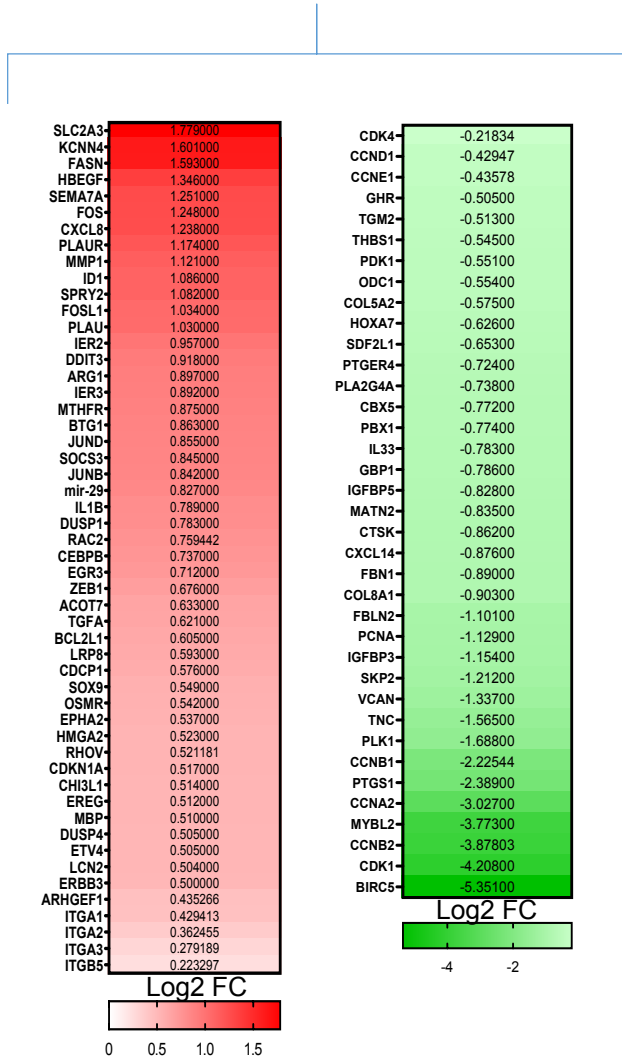

B.

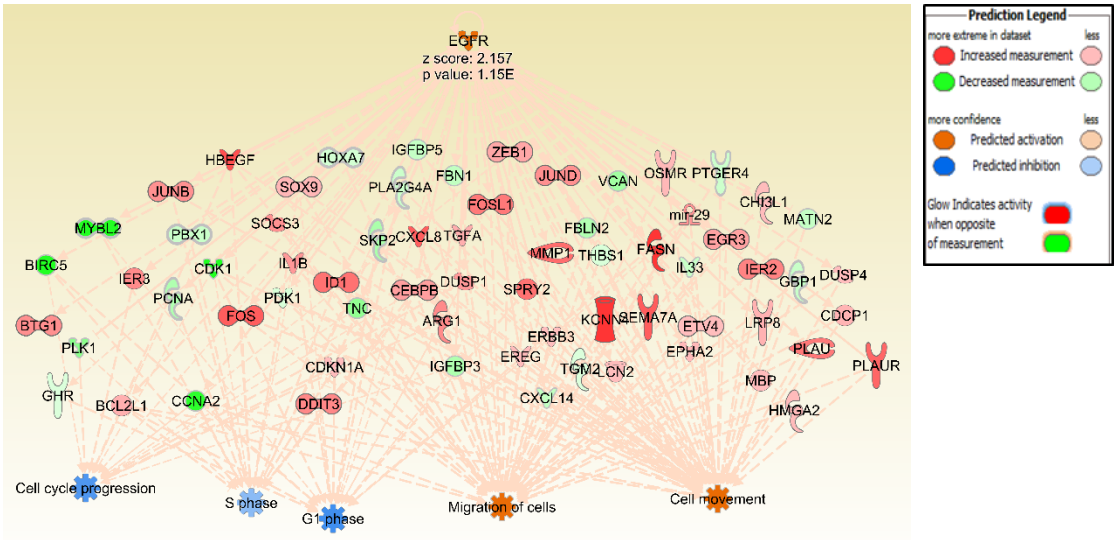

# Supplemental Figure 3.

A. Cav1 staining of Mev treated DFU.

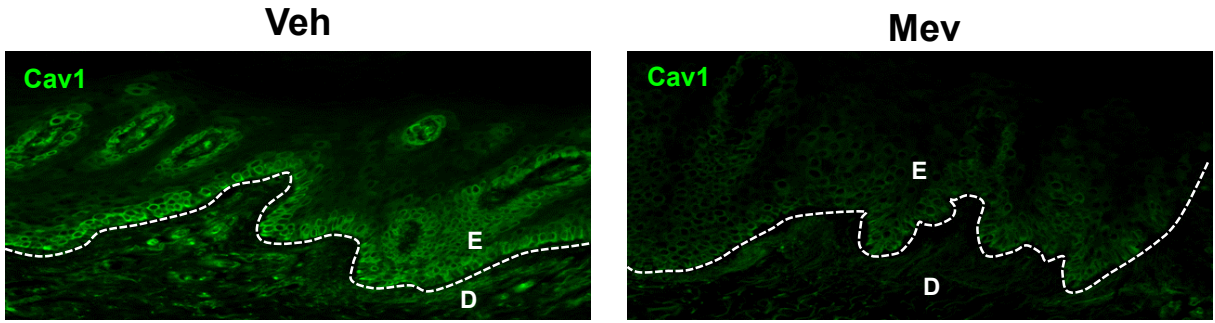

B. H&E Staining of Mev treated DFU.

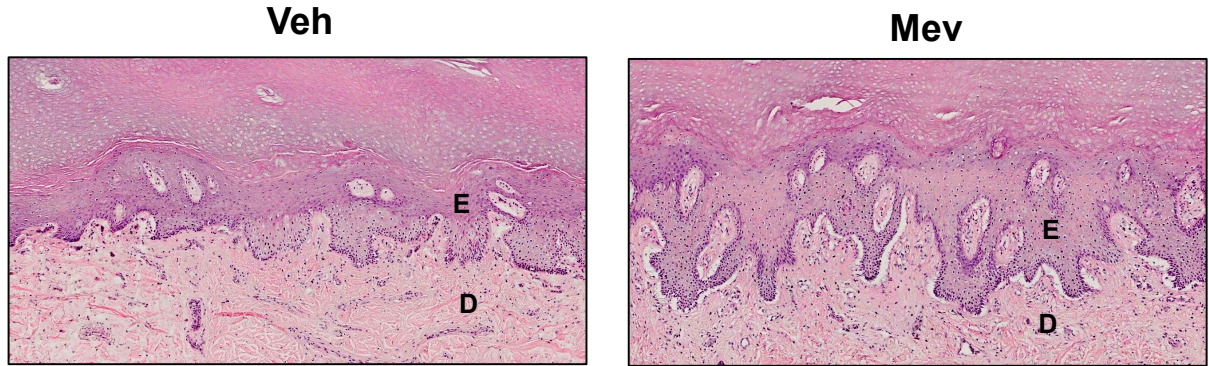

C. Cav1 staining of Mev treated porcine *in vivo* wounds.

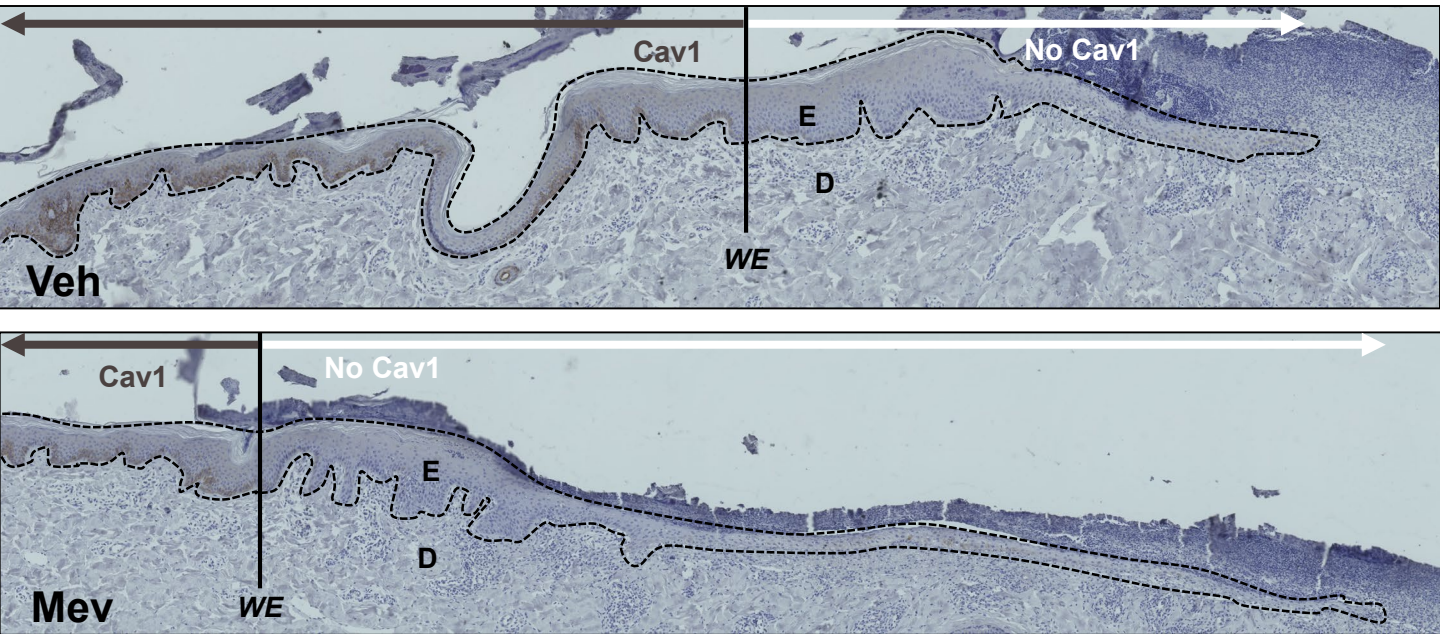

## Supplemental Figure 4.

**Mev regulation of the pro-migratory and proliferative proteins in Cav1 overexpressing HaCaT cells (Cav1<sup>OE</sup>).** Mev treatment reverses deregulated levels of migratory (ArhGEF1 and Rac2) and proliferative (Cyclin B1) proteins in Cav1<sup>OE</sup> keratinocytes. The data from control normal cells is presented in the Figure 1E.

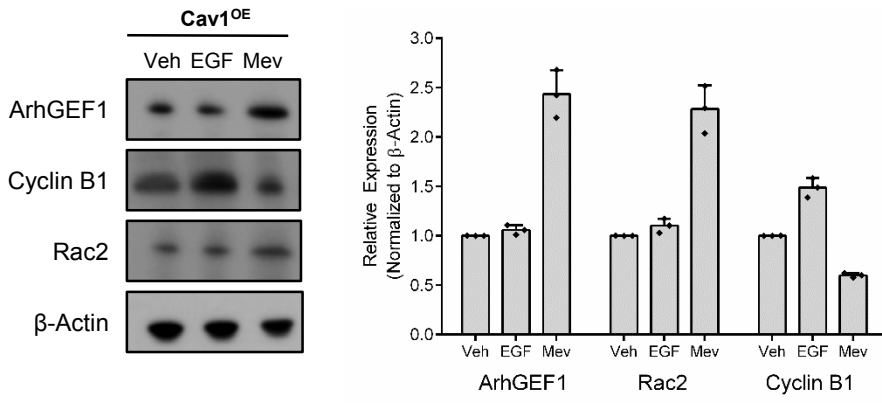

Supplement: jciinsight-4-129320-s177.pdf [file jciinsight-4-129320-s177.pdf]
